# Supplementary material for: HTAP_v2.2: a mosaic of regional and global emission grid maps for 2008 and 2010 to study hemispheric transport of air pollution
Source: Copernicus journal article supplement (doi:10.5194/acp-15-11411-2015), 2015-10-15
Supplement: Supplementary file 1 [file acp-15-11411-2015-supplement.zip]

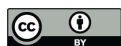

## *Supplement of*

# **HTAP\_v2.2: a mosaic of regional and global emission grid maps for 2008 and 2010 to study hemispheric transport of air pollution**

**G. Janssens-Maenhout et al.**

*Correspondence to:* G. Janssens-Maenhout ([greet.maenhout@jrc.ec.europa.eu](mailto:greet.maenhout@jrc.ec.europa.eu))

- [acp-15-11411-2015-supplement-title-page.pdf](#)
- [AnnexIII\\_Table\\_A3.1+3.2\\_HTAP\\_v2.2percapita\\_and\\_perGDP\\_emissions.xls](#)
- [AnnexII\\_TableA2.1+2.2+2.3\\_HTAP\\_v2.2emissions\\_persourceregion.xls](#)
- [AnnexIV\\_Table\\_A4\\_HTAP\\_v2.2implied\\_EF.xls](#)
- [SUPPLEMENTARY.doc](#)
- [Supplement\\_AnnexI\\_Table\\_S1.1+1.2\\_HTAP\\_v2.2emissions\\_percountryandsector+1.3\\_grid\\_tot\\_error.xls](#)

The copyright of individual parts of the supplement might differ from the CC-BY 3.0 licence.
